# Supplementary material for: Epidemiological topology data analysis links severe COVID-19 to RAAS and hyperlipidemia associated metabolic syndrome conditions
Source: PubMed Central journal article supplement (PMC11211822; doi:10.1093/bioinformatics/btae235), 2024-06-28
Supplement: btae235_supplementary_data.pdf [file btae235_supplementary_data.pdf]

Supplementary Table 1. Two sample cohorts were drawn from the Explorys system: a random sample and all the COVID-19 patients plus an equal sized randomly selected non-Covid-19 control group. The total counts indicate the number after dropping missing entries.

| Clinical Features        | Random Sample  |        | COVID Case - Control |        |
|--------------------------|----------------|--------|----------------------|--------|
|                          | Count          | %      | Count                | %      |
| Sex (F)                  | 532,327        | 53.1   | 293,902              | 54.5   |
| AGE ≥ 65                 | 258,082        | 25.9   | 129,708              | 24.0   |
| AD                       | 6,783          | 0.680  | 5,351                | 0.99   |
| HT                       | 232,264        | 23.3   | 170,614              | 31.6   |
| CKD                      | 37,466         | 3.76   | 33,832               | 6.27   |
| HL                       | 160,444        | 16.1   | 140,225              | 26.0   |
| Obese                    | 90,954         | 9.12   | 98,343               | 18.2   |
| CVD                      | 86,682         | 8.69   | 62,180               | 11.52  |
| T2D                      | 90,755         | 9.10   | 725,003              | 13.9   |
| COPD                     | 45,891         | 4.60   | 34,429               | 6.38   |
| Asthma                   | 91,181         | 9.14   | 69,474               | 12.9   |
| Edema                    | 70,827         | 7.10   | 69,577               | 12.9   |
| Pulmonary Edema pre C19  | 2,806          | 0.281  | 2,478                | 0.459  |
| Pulmonary Edema post C19 | 341            | 0.0342 | 4,078                | 0.766  |
| Tobacco                  | 31,478         | 3.16   | 24,097               | 4.47   |
| COVID-19                 | 4,824          | 0.486  | 269,536              | 49.96  |
| Severe COVID-19          | 477            | 0.0478 | 26,168               | 4.85   |
| Cancer                   | 5,580          | 8.58   | 55,642               | 10.3   |
| Substance Abuse          | 35,412         | 3.55   | 24,395               | 4.52   |
| Transplant               | 145            | 0.0145 | 303                  | 0.0561 |
| ACE inhibitor            | 32,749         | 3.28   | 44,215               | 8.20   |
| ARB                      | 16,282         | 1.63   | 24,989               | 4.63   |
| Beta Blocker             | 47,107         | 4.72   | 60,460               | 1.12   |
| Calcium Channel Block    | 23,815         | 2.39   | 37,181               | 6.89   |
| Statin                   | 40,757         | 4.09   | 57,637               | 10.7   |
| Fibrate                  | 5,458          | 0.547  | 7,563                | 1.40   |
| T2D Biguanide            | 12,614         | 1.27   | 25,060               | 4.64   |
| T2D Sulfonylurea         | 3,789          | 0.380  | 6,686                | 1.23   |
| African American         | 115,831        | 11.6   | 26,112               | 17.8   |
| Hispanic                 | 12,390         | 1.24   | 4,146                | 0.768  |
| European                 | 598,494        | 60.0   | 332,970              | 61.7   |
| BB & HT                  | 35,754         | 3.59   | 48,247               | 8.98   |
| ACE & HT                 | 30,099         | 3.02   | 42,357               | 7.85   |
| ARB & HT                 | 15,141         | 1.52   | 24,238               | 4.49   |
| RAAS                     | --             | --     | 59,419               | 11.01  |
| RAAS & HT                | --             | --     | 56,909               | 11.01  |
| AfAm & HT                | 34,420         | 3.45   | 41,613               | 7.71   |
| CCB & HT                 | 22,204         | 2.23   | 35,701               | 6.62   |
| <b>Total</b>             | <b>997,140</b> |        | <b>539,523</b>       |        |



| Independent variables    | Predicting Severe C19 from C19 only-in C19 cohort | Predicting Severe C19 from C19 only-in C19 cohort, pooled RAAS | Predicting Severe C19 from C19 only-no AfAm in C19 cohort | Predicting Severe C19 from C19 cohort AfAm only | Predicting C19 in C19 cohort | Predicting African Americans in Random cohort | Predicting HT in Random cohort | Predicting CVD in Random cohort | Type |
|--------------------------|---------------------------------------------------|----------------------------------------------------------------|-----------------------------------------------------------|-------------------------------------------------|------------------------------|-----------------------------------------------|--------------------------------|---------------------------------|------|
| Pulmonary Edema post C19 | 20.939                                            | 20.935                                                         | 25.543                                                    | 14.839                                          |                              |                                               |                                |                                 | OR   |
| Pulmonary Edema post C19 | 19.2-22.8                                         | 19.2-22.8                                                      | 23.0-28.4                                                 | 12.9-17.0                                       |                              |                                               |                                |                                 | CI   |
| Pulmonary Edema post C19 | p < 5e-4                                          | p < 5e-4                                                       | p < 5e-4                                                  | p < 5e-4                                        |                              |                                               |                                |                                 | pval |
| HL                       | 1.005                                             | 1.91                                                           | 0.963                                                     | 1.1                                             | 2.1                          | 0.607                                         | 6.292                          | 2.636                           | OR   |
| HL                       | 0.97-1.04                                         | 1.82-2.00                                                      | 0.92-1.01                                                 | 1.03-1.17                                       | 2.06-2.14                    | 0.59-0.62                                     | 6.19-6.39                      | 2.59-2.68                       | CI   |
| HL                       | p = 0.793                                         | p < 5e-4                                                       | p=0.1057                                                  | p=0.00350                                       | p < 5e-4                     | p < 5e-4                                      | p < 5e-4                       | p < 5e-4                        | pval |
| Statin                   | 0.992                                             | 1.001                                                          | 1.029                                                     | 0.829                                           | 1.744                        | 0.986                                         | 0.553                          |                                 | OR   |
| Statin                   | 0.95-1.04                                         | 0.96-1.05                                                      | 0.98-1.083                                                | 0.77-0.90                                       | 1.69-1.80                    | 0.95-1.03                                     | 0.53-0.57                      |                                 | CI   |
| Statin                   | p = 0.719                                         | 0.9544                                                         | p=0.279                                                   | p < 5e-4                                        | p < 5e-4                     | p = 0.503                                     | p < 5e-4                       |                                 | pval |
| Fibrate                  | 0.937                                             | 0.935                                                          | 0.934                                                     | 0.798                                           | 0.834                        | 0.458                                         | 0.767                          |                                 | OR   |
| Fibrate                  | 0.87-1.01                                         | 0.87-1.01                                                      | 0.86-1.02                                                 | 0.67-0.95                                       | 0.78-0.89                    | 0.42-0.50                                     | 0.69-0.85                      |                                 | CI   |
| Fibrate                  | p = 0.100                                         | 0.0893                                                         | p=0.1279                                                  | p = 0.00936                                     | p < 5e-4                     | p < 5e-4                                      | p < 5e-4                       |                                 | pval |
| Obese                    | 1.604                                             | 1.6                                                            | 1.522                                                     | 1.753                                           | 2.197                        | 1.399                                         | 3.574                          | 1.286                           | OR   |
| Obese                    | 1.55-1.66                                         | 1.55-1.65                                                      | 1.46-1.58                                                 | 1.66-1.85                                       | 2.16-2.24                    | 1.37-1.43                                     | 3.50-3.65                      | 1.26-1.32                       | CI   |
| Obese                    | p < 5e-4                                          | p < 5e-4                                                       | p < 5e-4                                                  | p < 5e-4                                        | p < 5e-4                     | p < 5e-4                                      | p < 5e-4                       | p < 5e-4                        | pval |
| CVD                      | 1.115                                             | 1.111                                                          | 1.1                                                       | 1.136                                           | 0.846                        | 0.881                                         |                                |                                 | OR   |
| CVD                      | 1.07-1.16                                         | 1.07-1.15                                                      | 1.05-1.15                                                 | 1.06-1.22                                       | 0.83-0.87                    | 0.86-0.90                                     |                                |                                 | CI   |
| CVD                      | p < 5e-4                                          | p < 5e-4                                                       | p < 5e-4                                                  | p < 5e-4                                        | p < 5e-4                     | p < 5e-4                                      |                                |                                 | pval |
| T2D                      | 1.734                                             | 1.733                                                          | 1.638                                                     | 1.926                                           | 0.907                        | 1.484                                         | 5.5                            | 1.814                           | OR   |
| T2D                      | 1.67-1.80                                         | 1.67-1.80                                                      | 1.56-1.72                                                 | 1.81-2.05                                       | 0.89-0.93                    | 1.45-1.52                                     | 5.39-5.62                      | 1.78-1.85                       | CI   |
| T2D                      | p < 5e-4                                          | p < 5e-4                                                       | p < 5e-4                                                  | p < 5e-4                                        | p < 5e-4                     | p < 5e-4                                      | p < 5e-4                       | p < 5e-4                        | pval |
| T2D Biguanide            | 0.842                                             | 0.847                                                          | 0.92                                                      | 0.704                                           | 2.076                        | 1.229                                         | 0.402                          |                                 | OR   |
| T2D Biguanide            | 0.80-0.88                                         | 0.80-0.89                                                      | 0.86-0.98                                                 | 0.65-0.77                                       | 1.98-2.17                    | 1.16-1.30                                     | 0.37-0.43                      |                                 | CI   |
| T2D Biguanide            | p < 5e-4                                          | p < 5e-4                                                       | p < 5e-4                                                  | p < 5e-4                                        | p < 5e-4                     | p < 5e-4                                      | p < 5e-4                       |                                 | pval |
| T2D Sulfonyluria         | 1.006                                             | 1.001                                                          | 1.032                                                     | 0.978                                           | 0.825                        | 1.097                                         | 0.56                           |                                 | OR   |
| T2D Sulfonyluria         | 0.93-1.09                                         | 0.93-1.08                                                      | 0.93-1.14                                                 | 0.86-1.11                                       | 0.76-0.89                    | 1.00-1.20                                     | 0.49-0.64                      |                                 | CI   |
| T2D Sulfonyluria         | p = 0.888                                         | 0.9722                                                         | 0.5372                                                    | p=0.7222                                        | p < 5e-4                     | p = 0.046                                     | p < 5e-4                       |                                 | pval |
| African American         | 1.415                                             | 1.416                                                          |                                                           |                                                 | 2.032                        |                                               | 1.764                          |                                 | OR   |
| African American         | 1.34-1.50                                         | 1.34-1.50                                                      |                                                           |                                                 | 1.99-2.07                    |                                               | 1.73-1.80                      |                                 | CI   |
| African American         | p < 5e-4                                          | p < 5e-4                                                       |                                                           |                                                 | p < 5e-4                     |                                               | p < 5e-4                       |                                 | pval |
| Hispanic                 |                                                   | 1.153                                                          |                                                           | 1.099                                           | 0.271                        |                                               |                                |                                 | OR   |
| Hispanic                 |                                                   | 0.89-1.50                                                      |                                                           | 0.38-4.00                                       | 0.25-0.29                    |                                               |                                |                                 | CI   |
| Hispanic                 |                                                   | 0.2864                                                         |                                                           | p=0.8859                                        | p < 5e-4                     |                                               |                                |                                 | pval |

Supplementary Table 3. Detailed results of network analysis using CuNA. The first column denotes the Nodes and their respective rank. The following columns (third to sixth) denotes the network, with their source (From) and sink (To), their strength in the fourth order interaction found by CuNA measured as the number of times they appeared together in significant redescription groups and their odds ratio computed using a logistic regression (age and sex as covariates).

| <b>Nodes</b> | <b>Agg Rank</b> | <b>From</b> | <b>To</b>  | <b>Strength</b> | <b>OR</b> |
|--------------|-----------------|-------------|------------|-----------------|-----------|
| Severe C19   | 5.8             | CKD         | BB         | 79              | 7.584     |
|              |                 | STAT        | BB         | 79              | 21.284    |
|              |                 | STAT        | RAAS       | 78              | 29.189    |
| COPD         | 7.8             | CKD         | RAAS       | 77              | 7.343     |
|              |                 | HT          | CKD        | 77              | 19.911    |
|              |                 | STAT        | Severe C19 | 77              | 4.33      |
|              |                 | RAAS        | Severe C19 | 76              | 3.9154    |
| C19          | 7.75            | CKD         | HL         | 75              | 10.678    |
| OBESE        | 13              | C19         | BB         | 75              | 4.409     |
| SEX          | 13              | HL          | BB         | 75              | 7.641     |
| CCB          | 13              | HL          | Severe C19 | 75              | 4.839     |
|              |                 | HT          | CCB        | 74              | 65.503    |
|              |                 | HT          | HL         | 73              | 14.497    |
| HL           | 2.6             | AfAm        | BB         | 72              | 1.56      |
|              |                 | OBSESE      | HL         | 72              | 5.55      |
| AfAm         | 5.8             | AfAm        | Severe C19 | 71              | 2.583     |
| RAAS         | 1.8             | AGE         | RAAS       | 70              | 3.72      |
| CKD          | 4               | AfAm        | C19        | 69              | 2.44      |
| STAT         | 8.5             | COPD        | RAAS       | 69              | 1.836     |
| HT           | 7.8             | COPD        | C19        | 64              | 1.836     |
| BB           | 2               | AfAm        | AGE        | 63              | 0.7       |
| AGE          | 10.75           | COPD        | SEX        | 44              | 0.97      |

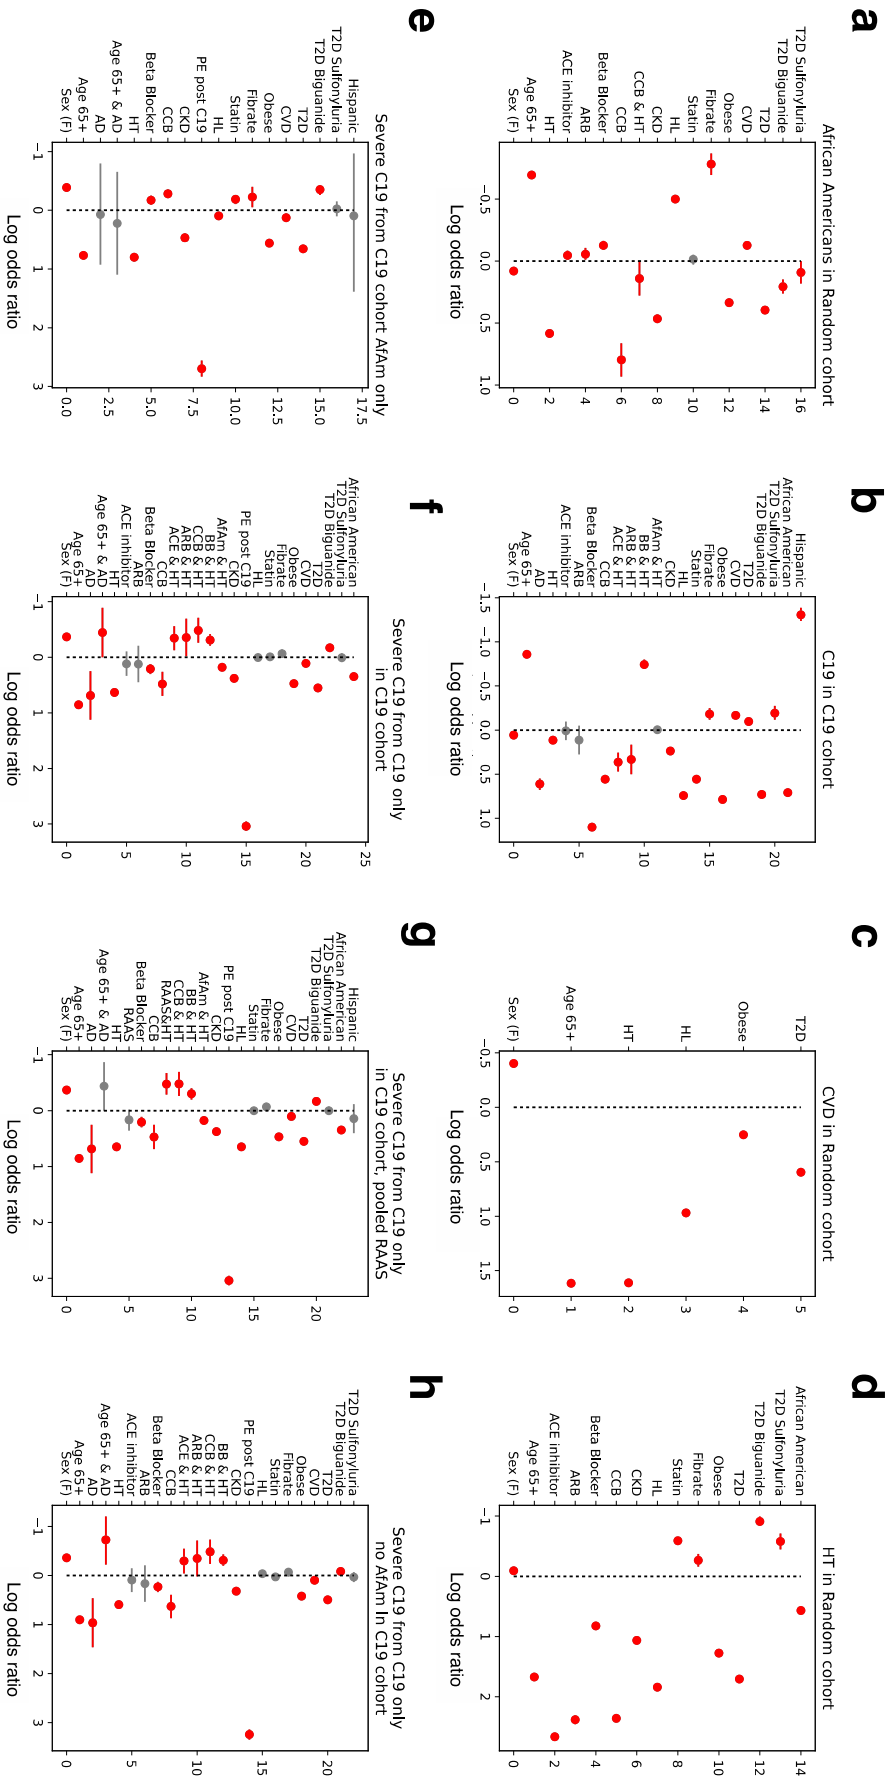

**Supplementary Figure 1.** Stratified logistic regressions predicting a) Black samples' affinity drawn from the randomized cohort, b) C19 infection from the C19 stratified cohort, c) CVD in the randomized cohort, d) HT in the randomized cohort, e) Severe C19 in the Black C19 only cohort, f) C19 from the C19 cohort, g) C19 from the C19 cohort, using pooled RAAS drugs as a covariate, h) C19 from the C19 cohort absent African Americans. Log odds ratios are plotted with 95% confidence intervals and colored red if  $p$ -value  $< 0.05$ , otherwise gray.





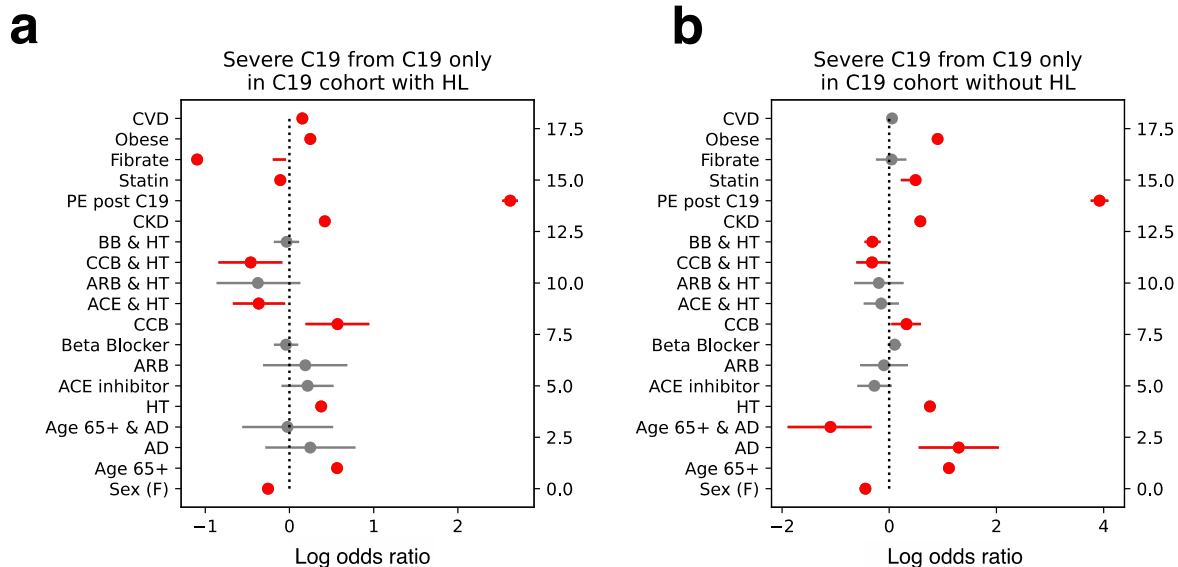

**Supplementary Figure 4.** Stratified logistic regression predicting severe C19 computed on C19 only patients from the C19 cohort with (a) and without (b) hyperlipidemia. Log odds ratios are plotted with 95% confidence intervals and colored red if  $p$ -value  $< 0.05$ , otherwise gray.

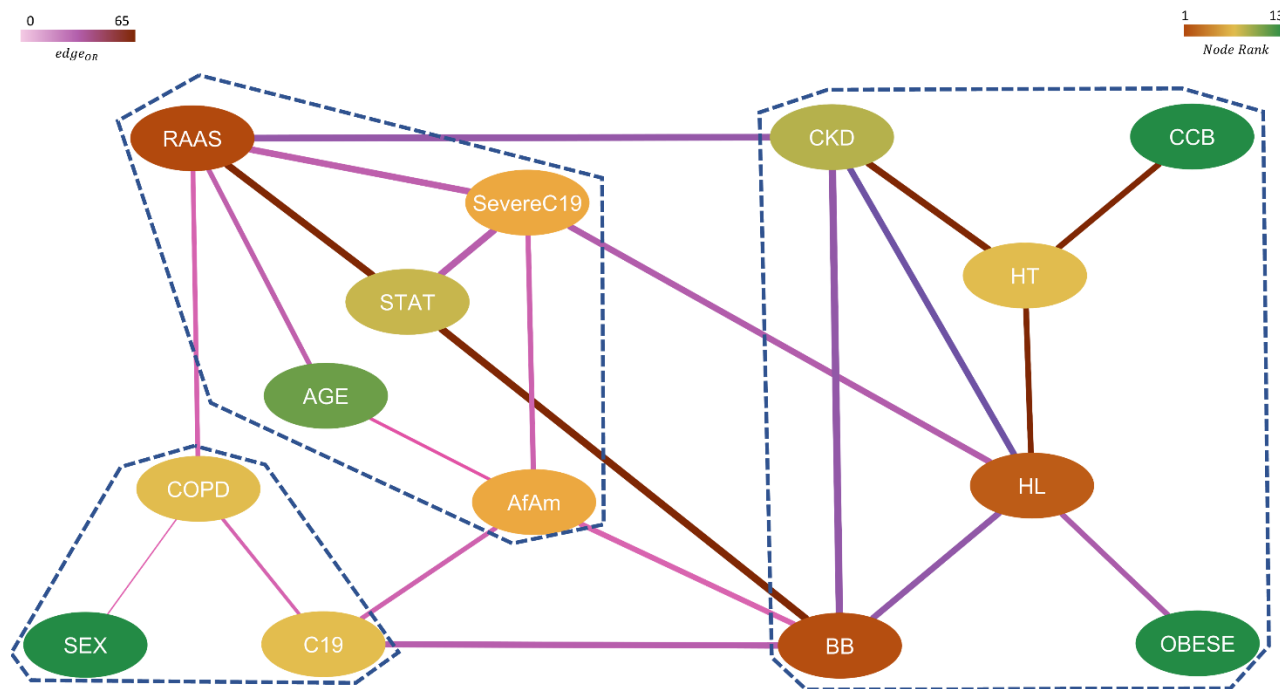

**Supplementary Figure 5.** Network representing significant, higher-order interactions between different features with nodes colored by their relative rank (gradient of brown to green corresponds to higher to lower rank) and edges colored by their respective pairwise odds ratios (gradient of light to dark corresponds to low to high OR) and edge width indicates the strength of the connection between them. The communities obtained from this network are marked by dashed lines.
